# Supplementary material for: All planetesimals born near the Kuiper belt formed as binaries
Source: Springer Nature journal article supplement (doi:10.1038/s41550-017-0088), 2017-04-04
Supplement: 41550_2017_BFs415500170088_MOESM12_ESM.pdf [file 41550_2017_BFs415500170088_MOESM12_ESM.pdf]

## Corrigendum: All planetesimals born near the Kuiper belt formed as binaries

Wesley C. Fraser, Michele T. Bannister, Rosemary E. Pike, Michael Marsset, Megan E. Schwamb, J. J. Kavelaars, Pedro Lacerda, David Nesvorný, Kathryn Volk, Audrey Delsanti, Susan Benecchi, Matthew J. Lehner, Keith Noll, Brett Gladman, Jean-Marc Petit, Stephen Gwyn, Ying-Tung Chen, Shiang-Yu Wang, Mike Alexandersen, Todd Burdullis, Scott Sheppard & Chad Trujillo

*Nature Astronomy* **1**, 0088 (2017); published 4 April 2017; corrected 24 April 2017.

In the version of the Supplementary Information originally published the 2001 XR254 measurement was mistakenly omitted from the Binary Objects section in Supplementary Table 1.

In the format provided by the authors and unedited.

## All planetesimals born near the Kuiper belt formed as binaries

Supplementary Table 1: Cold Classical KBO Optical Spectral Slopes

| Target              | <i>s</i>   | Target              | <i>s</i>   |
|---------------------|------------|---------------------|------------|
| Single Objects      |            |                     |            |
| 15760 - 1992 QB1    | 23.8 ± 2.3 | 2000 FS53           | 33.9 ± 2.0 |
| 16684 - 1994 JQ1    | 35.8 ± 3.0 | 2000 OH67           | 24.5 ± 5.1 |
| 19255 - 1994 VK8    | 26.1 ± 3.1 | 138537 - 2000 OK67  | 19.0 ± 1.9 |
| 1995 DC2            | 45.5 ± 1.4 | 2000 QC226          | 51.3 ± 5.6 |
| 1995 WY2            | 24.3 ± 6.0 | 2001 HZ58           | 22.8 ± 5.4 |
| 1996 TK66           | 26.7 ± 3.9 | 88268 - 2001 KK76   | 27.1 ± 3.6 |
| 1997 CT29           | 38.1 ± 5.1 | 2001 OQ108          | 30.3 ± 4.4 |
| 33001 - 1997 CU29   | 33.8 ± 2.1 | 2001 QE298          | 33.6 ± 2.3 |
| 52747 - 1998 HM151  | 27.9 ± 6.0 | 2001 QO297          | 32.2 ± 3.7 |
| 85627 - 1998 HP151  | 26.5 ± 6.3 | 2001 QP297          | 27.6 ± 1.2 |
| 385194 - 1998 KG62  | 31.7 ± 3.6 | 2001 QR297          | 24.5 ± 4.0 |
| 85633 - 1998 KR65   | 30.7 ± 1.5 | 2001 QS322          | 22.9 ± 3.3 |
| 1998 KS65           | 27.2 ± 2.4 | 2001 QX297          | 24.5 ± 3.5 |
| 69987 - 1998 WA25   | 17.1 ± 6.0 | 126719 - 2002 CC249 | 20.8 ± 4.6 |
| 1998 WX24           | 35.5 ± 4.3 | 2002 CU154          | 24.5 ± 4.0 |
| 1998 WY24           | 26.2 ± 2.6 | 2002 PD155          | 17.8 ± 5.6 |
| 1999 HG12           | 26.4 ± 1.7 | 2002 PV170          | 23.7 ± 2.2 |
| 1999 HS11           | 32.8 ± 3.3 | 385437 - 2003 GH55  | 24.5 ± 1.8 |
| 1999 HV11           | 24.3 ± 2.3 | 385447 - 2003 QF113 | 25.3 ± 3.4 |
| 385199 - 1999 OE4   | 14.6 ± 5.0 | 2003 QY111          | 17.3 ± 5.6 |
| 66452 - 1999 OF4    | 30.6 ± 6.0 | 2006 HW122          | 17.1 ± 6.1 |
| 455171 - 1999 OM4   | 21.5 ± 3.3 | 2006 QF181*         | 26.4 ± 1.2 |
| 1999 RC215          | 39.5 ± 5.3 | 2013 SP99*          | 34.7 ± 0.6 |
| 137294 - 1999 RE215 | 36.3 ± 2.5 | 2013 UL15*          | 26.1 ± 1.8 |
| 1999 RX214          | 20.9 ± 1.0 | 2013 UM15*          | 32.7 ± 1.8 |
| 2000 CE105          | 28.6 ± 4.3 | 2013 UN15*          | 36.6 ± 2.4 |
| 60454 - 2000 CH105  | 26.8 ± 1.2 | 2013 UO15*          | 27.0 ± 1.2 |
| 2000 CL104          | 21.4 ± 2.4 | 2013 UP15*          | 27.2 ± 0.6 |
| 2000 CN105          | 31.4 ± 3.8 | 2014 UE225*         | 35.6 ± 0.6 |
| Binary Objects      |            |                     |            |
| 58534 - 1997 CQ29   | 18.6 ± 5.0 | 148780 - 2001 UQ18  | 32.0 ± 4.1 |
| 79360 - 1997 CS29   | 29.7 ± 1.5 | 2002 VD131          | 6.8 ± 3.6  |
| 1999 RT214          | 37.4 ± 4.4 | 2002 VT130          | 22.7 ± 1.6 |
| 66652 - 1999 RZ253  | 37.1 ± 4.7 | 2003 HG57           | 10.2 ± 3.4 |
| 2000 CF105          | 21.6 ± 6.8 | 2003 QY90           | 30.6 ± 3.1 |
| 80806 - 2000 CM105  | 33.8 ± 7.0 | 2003 TJ58           | 25.0 ± 2.2 |
| 2000 CQ114          | 36.0 ± 0.6 | 2003 UN284          | 4.3 ± 5.8  |
| 134860 - 2000 OJ67  | 26.9 ± 3.0 | 2005 EO304          | 22.2 ± 3.1 |
| 123509 - 2000 WK183 | 25.4 ± 2.6 | 2006 BR284          | 30.8 ± 1.8 |
| 2000 WT169          | 19.9 ± 2.0 | 2006 CH69           | 37.3 ± 6.5 |
| 88611 - 2001 QT297  | 25.4 ± 2.3 | 364171 - 2006 JZ81  | 32.0 ± 4.2 |
| 2001 QW322          | -2.2 ± 3.3 | 2013 SQ99*          | 33.9 ± 1.8 |
| 275809 - 2001 QY297 | 30.0 ± 2.1 | 2014 UD225*         | 14.9 ± 0.6 |
| 2001 RZ143          | 19.2 ± 2.9 | 2016 BP81*          | 10.1 ± 1.3 |
| 2001 XR254          | 15.2 ± 4.4 |                     |            |

Note: Objects that are classified as blue have  $s < 17\%$ . Those objects with non-MPC designations are internal OSSOS designations of cold classical objects. \* - colours measured by Col-OSSOS.

Supplementary Table 2: Observed Binary Properties

| Target     | Separation (",km)                            | Secondary:Primary Brightness Ratio |
|------------|----------------------------------------------|------------------------------------|
| 2002 VD131 | $0.48 \pm 0.02, 14900 \pm 600$               | $0.061^{+0.012}_{-0.004}$          |
| 2016 BP81  | $0.369^{+0.02}_{-0.01}, 11300^{+600}_{-300}$ | $0.81^{+0.09}_{-0.06}$             |
| 2013 SQ99  | $0.39^{+0.02}_{-0.01}, 13300^{+700}_{-300}$  | $0.65^{+0.06}_{-0.05}$             |
| 2014 UD225 | $0.67 \pm 0.02, 21400 \pm 600$               | $0.12 \pm 0.01$                    |

Note: Uncertainties are  $1 - \sigma$  uncertainties. The confidence intervals have been combined using all images available for each target for the quoted uncertainties. Binary properties were measured from Gemini-GMOS images of 2013 SQ99 and 04h45. For 2016 BP81, only the single GMOS frame with the best image quality was used as it was the only frame to resolve the two components. The single images with best image quality from each of the Magellan and CFHT image sequences were used to measure the properties of 2002 VD131.

Supplementary Table 3: Initial and final properties of example cloud collapse simulations

| $\Omega$ ( $\Omega_{\text{circ}}$ ) | $r_p$ (km) | $r_s$ (km) | $a_{\text{bin}}$ (km) |
|-------------------------------------|------------|------------|-----------------------|
| 0.1                                 | 138.5      | 66.8       | 4731                  |
| 0.5                                 | 99.2       | 69.9       | 5281                  |
| 0.75                                | 90.2       | 65.9       | 7066                  |

Note: Initial mass  $M_{\text{tot}}$  and cloud angular velocity are presented.  $\Omega_{\text{circ}} = \sqrt{\frac{GM_{\text{tot}}}{R_{\text{tot}}^3}}$  where  $R_{\text{tot}}$  is the initial cloud radius. Final primary and secondary radii and binary semi-major axis at end of the simulations are also presented.

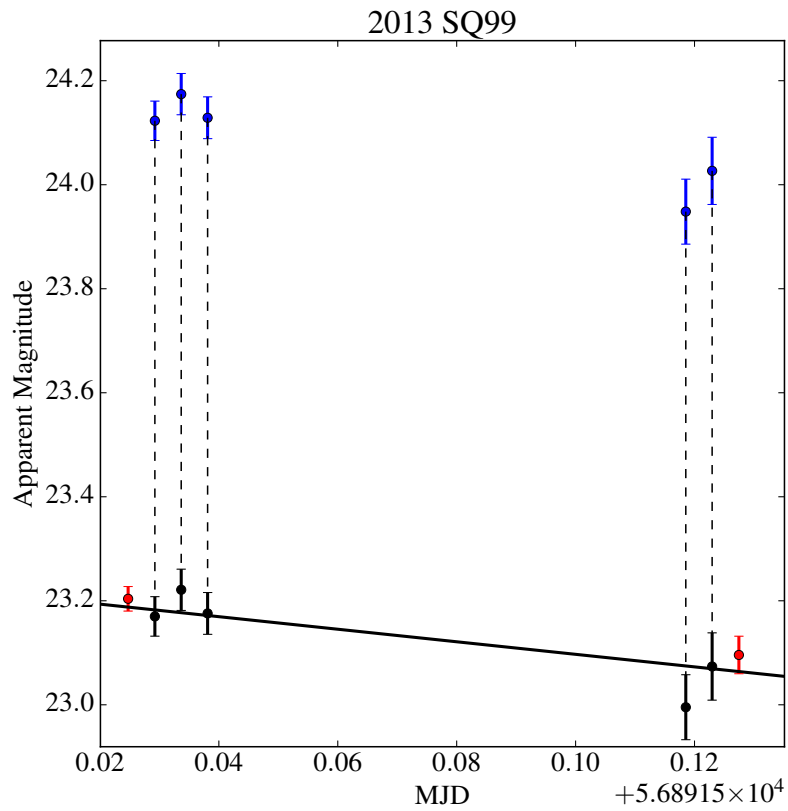

Supplementary Figure 1: Observed apparent magnitudes of binary 2013 SQ99 in the  $r'$  (red) and  $g'$  (blue) filters. Black points show  $r'$  magnitudes estimated from the  $g'$  observations and the mean  $(g'-r') = 0.89 \pm 0.02$  colour in the Gemini filters. The best-fit linear lightcurve which decreases  $\sim 0.04$  mags from start to end of sequence is shown by the solid black line.

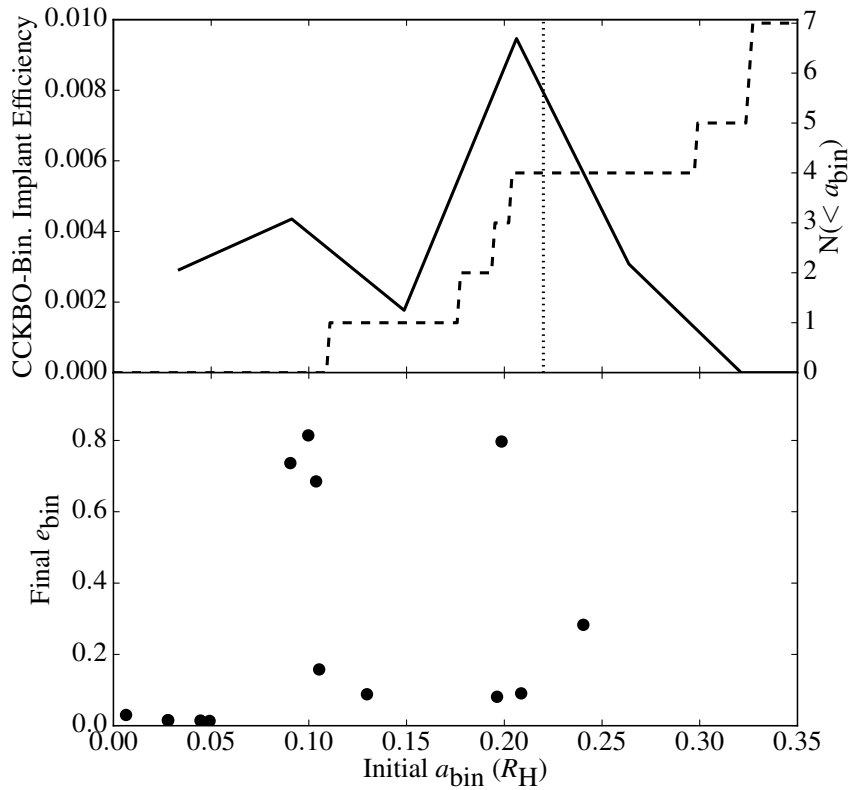

Supplementary Figure 2: Top: the solid line presents the efficiency of implantation by migration of binaries into the cold classical region as a function of initial binary semi-major axis. The dashed line presents the cumulative distribution of singles implanted in the cold classical region as a function of initial binary semi-major axis. The vertical dashed line presents the current binary semi-major axis of the widest separated known, cold classical binary, 2001 QW322. Bottom: final eccentricity of CCKBO binary survivors vs. initial binary semi-major axis.

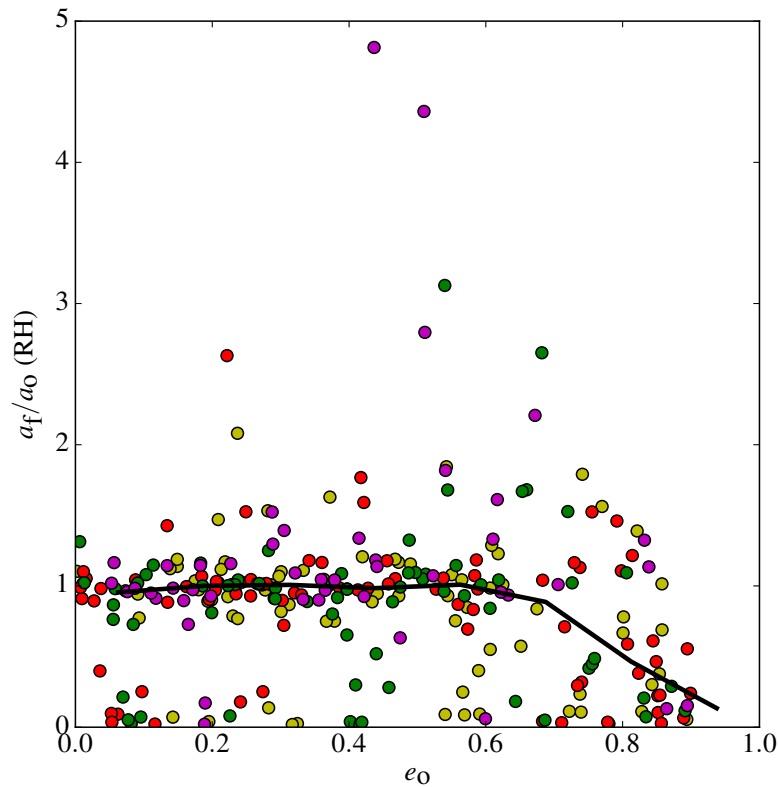

Supplementary Figure 3: Ratio of final and initial binary semi-major axis vs. initial binary eccentricity for the binary evolution simulations of Bruini and Zanardi (2016) which assumed a tidal quality factor of  $Q=10$ . Yellow, red, green, and magenta points correspond to binary size ratios of 0.25, 0.5, 0.75, and 1. The black line depicts the mean ratio as a function of initial eccentricity for the entire sample. A mean reduction in semi-major axis is observed for eccentricities  $e_0 \gtrsim 0.6$  where tidal forces become the dominant driver of the binary evolution.

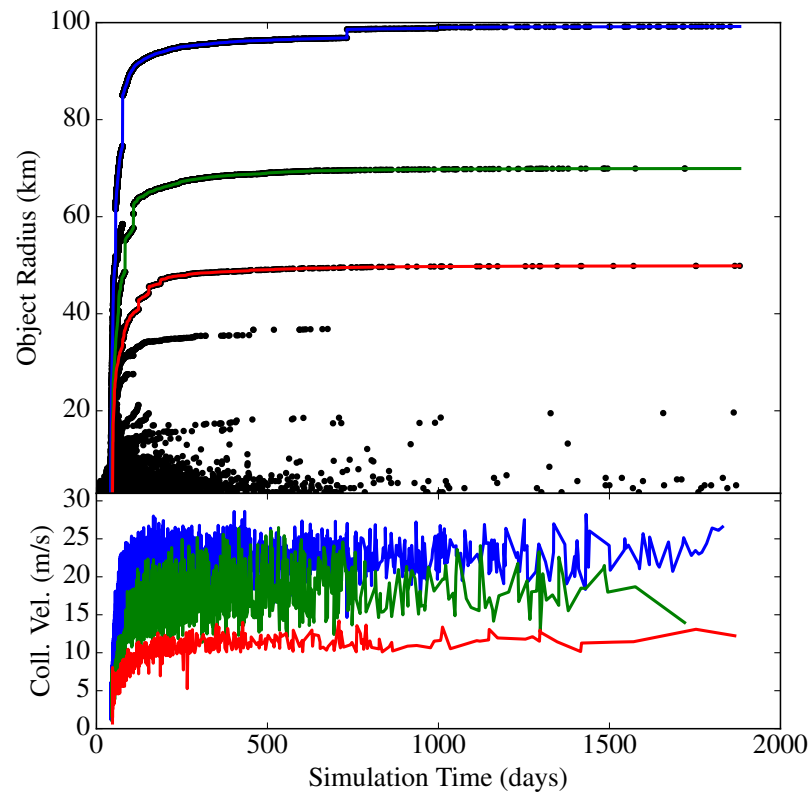

Supplementary Figure 4: The collisional growth during the collapse of a gravitationally bound cloud. The growth and collisions experienced by the largest three bodies which the simulation produces are traced by the blue, green, and red lines, respectively. The top panel displays the evolution of the radius of each object as a function of time. Black dots denote when a collision occurs, and the radius of the merged body. The bottom panel displays the collision velocities of each collision in the top panel. The collision velocities are very similar regardless of impactor size. As exhibited by the nearly smoothly increasing radius of the large bodies with time, impacts are dominated by the smallest bodies in the simulation.
